# Supplementary material
Source: Springer Nature journal article supplement (https://www.springermedizin.de/resource/supplementary/12884_2012_693_MOESM1_ESM.pdf/9458494)
Supplement: MOESM1 [file 9458494]

## Peer-reviewed literature

(PubMed search, no limits: misoprostol AND “postpartum hemorrhage” AND (home OR community))

50 results

26 results excluded on title/abstract review:

- 16 were policy or commentary
- 6 did not involve misoprostol alone or were not implementation studies (e.g. cost-effectiveness)
- 1 involved misoprostol for a non-PPH use
- 3 were otherwise irrelevant

16 results excluded on full-text review:

- 8 did not use original data
- 2 did not use misoprostol at home births
- 6 did not present data corresponding to a majority of the extraction categories

**8 peer-reviewed literature results included**

## Grey literature

(Directed search of websites and inquiries within professional networks)

55 results

41 results excluded on summary review:

- 8 were policy or commentary
- 26 did not involve misoprostol alone or did not discuss implementation
- 3 involved misoprostol for a non-PPH use
- 4 were otherwise irrelevant

4 results excluded because there was no formally-reported data

**10 grey literature results included**
